# Supplementary material for: Translating Proteomic Into Functional Data: An High Mobility Group A1 (HMGA1) Proteomic Signature Has Prognostic Value in Breast Cancer
Source: PubMed Central journal article supplement (PMC4762532; doi:10.1074/mcp.m115.050401), 2015-11-02
Supplement: 10.1074_M115.050401_mcp.M115.050401-4.pdf [file 10.1074_M115.050401_mcp.M115.050401-4.pdf]

Suppl. Table 3 – Label Free Proteomic data – Up-regulated proteins (u-A1) – Ingenuity Analysis

| <b>Diseases and Disorders</b>                        |                                                 |                    |
|------------------------------------------------------|-------------------------------------------------|--------------------|
| <b>Name</b>                                          | <b>p-value</b>                                  | <b># Molecules</b> |
| Infectious Disease                                   | $3.18 \times 10^{-04}$ - $2.82 \times 10^{-02}$ | 79                 |
| Dermatological Diseases and Conditions               | $4.72 \times 10^{-04}$ - $2.82 \times 10^{-02}$ | 64                 |
| Immunological Disease                                | $4.72 \times 10^{-04}$ - $2.85 \times 10^{-02}$ | 25                 |
| Inflammatory Disease                                 | $4.72 \times 10^{-04}$ - $2.82 \times 10^{-02}$ | 15                 |
| Developmental Disorder                               | $6.90 \times 10^{-04}$ - $2.82 \times 10^{-02}$ | 33                 |
| <b>Molecular and Cellular Functions</b>              |                                                 |                    |
| <b>Name</b>                                          | <b>p-value</b>                                  | <b># Molecules</b> |
| Protein Synthesis                                    | $2.47 \times 10^{-06}$ - $2.82 \times 10^{-02}$ | 40                 |
| Gene Expression                                      | $8.64 \times 10^{-06}$ - $2.03 \times 10^{-02}$ | 18                 |
| Energy Production                                    | $5.42 \times 10^{-05}$ - $1.10 \times 10^{-02}$ | 20                 |
| Lipid Metabolism                                     | $5.42 \times 10^{-05}$ - $2.82 \times 10^{-02}$ | 37                 |
| Small Molecule Biochemistry                          | $5.42 \times 10^{-05}$ - $2.82 \times 10^{-02}$ | 74                 |
| <b>Physiological System Development and Function</b> |                                                 |                    |
| <b>Name</b>                                          | <b>p-value</b>                                  | <b># Molecules</b> |
| Behavior                                             | $7.92 \times 10^{-04}$ - $2.82 \times 10^{-02}$ | 2                  |
| Hair and Skin Development and Function               | $2.33 \times 10^{-03}$ - $2.82 \times 10^{-02}$ | 3                  |
| Tumor Morphology                                     | $5.15 \times 10^{-03}$ - $2.82 \times 10^{-02}$ | 5                  |
| Renal and Urological System Development and Function | $7.49 \times 10^{-03}$ - $7.49 \times 10^{-03}$ | 2                  |
| Tissue Development                                   | $7.49 \times 10^{-03}$ - $2.82 \times 10^{-02}$ | 7                  |
