# Supplementary material for: Translating Proteomic Into Functional Data: An High Mobility Group A1 (HMGA1) Proteomic Signature Has Prognostic Value in Breast Cancer
Source: PubMed Central journal article supplement (PMC4762532; doi:10.1074/mcp.m115.050401), 2015-11-02
Supplement: 10.1074_M115.050401_mcp.M115.050401-5.pdf [file 10.1074_M115.050401_mcp.M115.050401-5.pdf]

Suppl. Table 4 – Label Free Proteomic data – Down-regulated proteins (d-A1) – Ingenuity Analysis

| <b>Diseases and Disorders</b>                         |                                               |                    |
|-------------------------------------------------------|-----------------------------------------------|--------------------|
| <i>Name</i>                                           | <i>p-value</i>                                | <i># Molecules</i> |
| Infectious Disease                                    | $1.48 \times 10^{-06} - 2.75 \times 10^{-02}$ | 87                 |
| Organismal Injury and Abnormalities                   | $2.63 \times 10^{-05} - 2.75 \times 10^{-02}$ | 29                 |
| Dermatological Diseases and Conditions                | $2.76 \times 10^{-05} - 2.75 \times 10^{-02}$ | 27                 |
| Renal and Urological Disease                          | $4.46 \times 10^{-05} - 2.75 \times 10^{-02}$ | 36                 |
| Cancer                                                | $1.93 \times 10^{-04} - 2.75 \times 10^{-02}$ | 150                |
| <b>Molecular and Cellular Functions</b>               |                                               |                    |
| <i>Name</i>                                           | <i>p-value</i>                                | <i># Molecules</i> |
| Cell Cycle                                            | $5.27 \times 10^{-10} - 2.75 \times 10^{-02}$ | 95                 |
| Cellular Movement                                     | $9.92 \times 10^{-09} - 2.75 \times 10^{-02}$ | 59                 |
| Cellular Assembly and Organization                    | $1.12 \times 10^{-07} - 2.75 \times 10^{-02}$ | 69                 |
| DNA Replication, Recombination, and Repair            | $1.12 \times 10^{-07} - 2.75 \times 10^{-02}$ | 65                 |
| Cell Signaling                                        | $1.14 \times 10^{-06} - 2.75 \times 10^{-02}$ | 31                 |
| <b>Physiological System Development and Function</b>  |                                               |                    |
| <i>Name</i>                                           | <i>p-value</i>                                | <i># Molecules</i> |
| Cardiovascular System Development and Function        | $5.19 \times 10^{-05} - 2.48 \times 10^{-02}$ | 24                 |
| Skeletal and Muscular System Development and Function | $1.97 \times 10^{-04} - 2.75 \times 10^{-02}$ | 6                  |
| Tissue Development                                    | $1.97 \times 10^{-04} - 2.75 \times 10^{-02}$ | 27                 |
| Tumor Morphology                                      | $6.63 \times 10^{-04} - 2.75 \times 10^{-02}$ | 11                 |
| Hematological System Development and Function         | $7.53 \times 10^{-04} - 2.75 \times 10^{-02}$ | 8                  |
