# Supplementary material for: Translating Proteomic Into Functional Data: An High Mobility Group A1 (HMGA1) Proteomic Signature Has Prognostic Value in Breast Cancer
Source: PubMed Central journal article supplement (PMC4762532; doi:10.1074/mcp.m115.050401), 2015-11-02
Supplement: 10.1074_M115.050401_mcp.M115.050401-7.pdf [file 10.1074_M115.050401_mcp.M115.050401-7.pdf]

Suppl. table 6 – The cancer related information available in PubMed for HRS members.

| <i>Protein</i>     | <i>Ratio</i> |                  | <i>PubMed*</i> |               | <i>Role in cancer</i> | <i>Link with clinical data</i> |
|--------------------|--------------|------------------|----------------|---------------|-----------------------|--------------------------------|
|                    | <i>siA1</i>  | <i>3/siCTRL</i>  | <i>All</i>     | <i>Cancer</i> |                       |                                |
|                    | <i>Array</i> | <i>Proteomic</i> |                |               |                       |                                |
| ATAD2              | 0.299        | 0.338            | 37             | 33            | Green                 | Green                          |
| BAZ1B              | 0.300        | 0.365            | 69             | 14            | Yellow                | Yellow                         |
| COPS2              | 0.167        | 0.673            | 66             | 18            | Yellow                | Red                            |
| CSF-1              | 0.295        | 0.312            | 5775           | 2213          | Green                 | Green                          |
| DDX18              | 0.291        | 0.697            | 11             | 4             | Yellow                | Red                            |
| GFPT1              | 0.170        | 0.759            | 143            | 14            | Red                   | Yellow                         |
| GNAI3              | 0.314        | 0.566            | 98             | 12            | Yellow                | Yellow                         |
| DLGAP5             | 0.322        | 0.524            | 90             | 40            | Green                 | Green                          |
| ILF2               | 0.228        | 0.755            | 68             | 15            | Yellow                | Yellow                         |
| KIF11 <sup>1</sup> | 0.290        | 0.467            | 556            | 218           | Green                 | Green                          |
| KIFC1              | 0.327        | 0.570            | 81             | 17            | Yellow                | Yellow                         |
| LRRC59             | 0.096        | 0.631            | 11             | 3             | Yellow                | Red                            |
| NCAPG              | 0.132        | 0.709            | 129            | 42            | Green                 | Green                          |
| PGRMC1             | 0.278        | 0.230            | 155            | 59            | Green                 | Yellow                         |
| PRPF4B             | 0.344        | 0.699            | 65             | 5             | Yellow                | Red                            |
| RPRD1A             | 0.278        | 0.362            | 6              | 5             | Yellow                | Red                            |
| RRM2               | 0.292        | 0.540            | 259            | 154           | Green                 | Green                          |
| SMC2               | 0.285        | 0.645            | 106            | 22            | Yellow                | Yellow                         |
| TOP2A              | 0.234        | 0.420            | 602            | 428           | Green                 | Green                          |
| TRIP13             | 0.348        | 0.705            | 59             | 7             | Yellow                | Yellow                         |
| WHSC1              | 0.152        | 0.681            | 163            | 102           | Green                 | Green                          |

**Green:** well established

**Yellow:** not unambiguously established / few information available

**Red:** no information available

\* the criteria for PubMed literature researches are reported in supplementary methods (data relative to October 2014)
