# Supplementary material for: Translating Proteomic Into Functional Data: An High Mobility Group A1 (HMGA1) Proteomic Signature Has Prognostic Value in Breast Cancer
Source: PubMed Central journal article supplement (PMC4762532; doi:10.1074/mcp.m115.050401), 2015-11-02
Supplement: 10.1074_M115.050401_mcp.M115.050401-8.pdf [file 10.1074_M115.050401_mcp.M115.050401-8.pdf]

Suppl. table 7 - Multivariate analyses to evaluate the independent prognostic value of dA1 and HRS.

|                         | <i>d-A1</i> |                |                | <i>HRS</i> |                |                |
|-------------------------|-------------|----------------|----------------|------------|----------------|----------------|
|                         | <i>HR</i>   | <i>95 % CI</i> | <i>p value</i> | <i>HR</i>  | <i>95 % CI</i> | <i>p value</i> |
| <b>OS</b>               |             |                |                |            |                |                |
| <b>Size: &gt;20 mm</b>  | 1.95        | 1.47-2.61      | <0.00001       | 1.99       | 1.49-2.65      | <0.00001       |
| <b>Age: &gt; 50</b>     | 1.5         | 1.12-2.01      | 0.006          | 1.48       | 1.1-1.98       | 0.008          |
| <b>Grade: G3</b>        | 1.26        | 0.91-1.75      | 0.17           | 1.2        | 0.84-1.69      | 0.31           |
| <b>Node status: neg</b> | 0.47        | 0.35-0.62      | 1.12           | 0.47       | 0.35-0.62      | <0.00001       |
| <b>ER status: pos</b>   | 0.89        | 0.64-1.26      | 0.51           | 0.91       | 0.65-1.27      | 0.57           |
| <b>Expr. level: low</b> | 0.68        | 0.51-0.92      | 0.01           | 0.7        | 0.5-0.97       | 0.031          |
| <b>RFS</b>              |             |                |                |            |                |                |
| <b>Size: &gt;20 mm</b>  | 1.73        | 1.36-2.21      | <0.00001       | 1.72       | 1.35-2.2       | 0.000013       |
| <b>Age: &gt; 50</b>     | 0.86        | 0.67-1.11      | 0.25           | 0.85       | 0.66-1.1       | 0.21           |
| <b>Grade: G3</b>        | 1.03        | 0.78-1.37      | 0.82           | 0.9        | 0.67-1.2       | 0.46           |
| <b>Node status: neg</b> | 0.69        | 0.53-0.91      | 0.007          | 0.71       | 0.54-0.92      | 0.01           |
| <b>ER status: pos</b>   | 0.85        | 0.62-1.16      | 0.3            | 0.89       | 0.65-1.22      | 0.46           |
| <b>Expr. level: low</b> | 0.7         | 0.55-0.91      | 0.006          | 0.56       | 0.43-0.73      | 0.000015       |
| <b>DMFS</b>             |             |                |                |            |                |                |
| <b>Size: &gt;20 mm</b>  | 1.18        | 0.89-1.58      | 0.25           | 1.17       | 0.88-1.57      | 0.27           |
| <b>Age: &gt; 50</b>     | 1.2         | 0.89-1.61      | 0.23           | 1.2        | 0.89-1.61      | 0.22           |
| <b>Grade: G3</b>        | 1.7         | 1.24-2.32      | 0.0008         | 1.6        | 1.16-2.2       | 0.003          |
| <b>Node status: neg</b> | 0.6         | 0.42-0.86      | 0.005          | 0.62       | 0.44-0.89      | 0.008          |
| <b>ER status: pos</b>   | 0.93        | 0.66-1.29      | 0.65           | 0.95       | 0.68-1.33      | 0.76           |
| <b>Expr. level: low</b> | 0.61        | 0.45-0.82      | 0.001          | 0.58       | 0.42-0.81      | 0.001          |
