# Supplementary material for: Translating Proteomic Into Functional Data: An High Mobility Group A1 (HMGA1) Proteomic Signature Has Prognostic Value in Breast Cancer
Source: PubMed Central journal article supplement (PMC4762532; doi:10.1074/mcp.m115.050401), 2015-11-02
Supplement: 10.1074_M115.050401_mcp.M115.050401-9.pdf [file 10.1074_M115.050401_mcp.M115.050401-9.pdf]

Suppl. table 8 - Multivariate analyses to evaluate the independent prognostic value of KIFC1, LRRC59, and TRIP13.

|                         | <i>KIFC1</i> |                |                | <i>LRRC59</i> |                |                | <i>TRIP13</i> |                |                |
|-------------------------|--------------|----------------|----------------|---------------|----------------|----------------|---------------|----------------|----------------|
|                         | <i>HR</i>    | <i>95 % CI</i> | <i>p value</i> | <i>HR</i>     | <i>95 % CI</i> | <i>p value</i> | <i>HR</i>     | <i>95 % CI</i> | <i>p value</i> |
| <b>OS</b>               |              |                |                |               |                |                |               |                |                |
| <b>Size: &gt;20 mm</b>  | 1.96         | 1.47-2.61      | <0.00001       | 1.99          | 1.5-2.66       | <0.00001       | 1.95          | 1.46-2.6       | 0.00001        |
| <b>Age: &gt; 50</b>     | 1.47         | 1.1-1.96       | 0.01           | 1.49          | 1.11-1.99      | 0.008          | 1.42          | 1.06-1.9       | 0.02           |
| <b>Grade: G3</b>        | 1.21         | 0.88-1.68      | 0.24           | 1.32          | 0.95-1.84      | 0.1            | 1.11          | 0.79-1.57      | 0.55           |
| <b>Node status: neg</b> | 0.46         | 0.35-0.6       | <0.00001       | 0.47          | 0.36-0.62      | <0.00001       | 0.47          | 0.35-0.62      | <0.00001       |
| <b>ER status: pos</b>   | 0.88         | 0.63-1.23      | 0.46           | 0.85          | 0.61-1.19      | 0.35           | 0.91          | 0.65-1.27      | 0.58           |
| <b>Expr. level: low</b> | 0.62         | 0.46-0.84      | 0.002          | 0.83          | 0.62-1.11      | 0.2            | 0.6           | 0.44-0.82      | 0.001          |
| <b>RFS</b>              |              |                |                |               |                |                |               |                |                |
| <b>Size: &gt;20 mm</b>  | 1.68         | 1.32-2.14      | 0.00003        | 1.73          | 1.35-2.2       | 1.00E-05       | 1.74          | 1.36-2.22      | 0.00001        |
| <b>Age: &gt; 50</b>     | 0.83         | 0.65-1.07      | 0.16           | 0.85          | 0.66-1.09      | 0.2            | 0.79          | 0.61-1.03      | 0.08           |
| <b>Grade: G3</b>        | 0.93         | 0.7-1.23       | 0.6            | 0.75          | 0.37-1.54      | 0.72           | 0.85          | 0.63-1.14      | 0.28           |
| <b>Node status: neg</b> | 0.72         | 0.55-0.94      | 0.02           | 0.82          | 0.33-2.05      | 0.004          | 0.71          | 0.54-0.93      | 0.01           |
| <b>ER status: pos</b>   | 0.9          | 0.66-1.22      | 0.5            | 0.52          | 0.24-1.12      | 0.15           | 0.91          | 0.66-1.24      | 0.55           |
| <b>Expr. level: low</b> | 0.46         | 0.35-0.6       | <0.00001       | 2.01          | 1.11-3.65      | 0.04           | 0.52          | 0.4-0.68       | <0.00001       |
| <b>DMFS</b>             |              |                |                |               |                |                |               |                |                |
| <b>Size: &gt;20 mm</b>  | 1.13         | 0.85-1.52      | 0.4            | 1.15          | 0.86-1.55      | 0.33           | 1.22          | 0.91-1.63      | 0.18           |
| <b>Age: &gt; 50</b>     | 1.2          | 0.89-1.62      | 0.22           | 1.21          | 0.9-1.63       | 0.2            | 1.15          | 0.85-1.54      | 0.36           |
| <b>Grade: G3</b>        | 1.77         | 1.31-2.4       | 0.0002         | 1.77          | 1.3-2.4        | 3.00E-04       | 1.47          | 1.07-2.03      | 0.02           |
| <b>Node status: neg</b> | 0.61         | 0.43-0.88      | 0.007          | 0.63          | 0.44-0.89      | 0.01           | 0.6           | 0.42-0.86      | 0.005          |
| <b>ER status: pos</b>   | 0.88         | 0.64-1.23      | 0.46           | 0.86          | 0.62-1.19      | 0.36           | 0.93          | 0.67-1.3       | 0.69           |
| <b>Expr. level: low</b> | 0.66         | 0.49-0.89      | 0.007          | 0.67          | 0.5-0.89       | 0.006          | 0.51          | 0.37-0.71      | 0.00006        |
