# Supplementary material for: Translating Proteomic Into Functional Data: An High Mobility Group A1 (HMGA1) Proteomic Signature Has Prognostic Value in Breast Cancer
Source: PubMed Central journal article supplement (PMC4762532; doi:10.1074/mcp.m115.050401), 2015-11-02
Supplement: 10.1074_M115.050401_mcp.M115.050401-10.pdf [file 10.1074_M115.050401_mcp.M115.050401-10.pdf]

Suppl. Table 9 - Evaluation of over- and under-expression of KIFC1, LRRC59, and TRIP13 in cancer versus normal tissue within the Oncomine patient's dataset.

| <i>Cancer type</i>          | <i>Cancer vs Normal</i> |   |               |   |               |   |
|-----------------------------|-------------------------|---|---------------|---|---------------|---|
|                             | <b>KIFC1</b>            |   | <b>LRRC59</b> |   | <b>TRIP13</b> |   |
| <b>Bladder</b>              | 2                       |   |               |   | 3             |   |
| <b>Brain and CNS</b>        | 4                       |   |               |   |               | 1 |
| <b>Breast</b>               | 11                      |   | 3             |   | 6             | 1 |
| <b>Cervical</b>             | 2                       |   |               |   | 2             |   |
| <b>Colorectal</b>           | 3                       |   |               |   | 15            |   |
| <b>Esophageal</b>           |                         |   |               |   | 2             |   |
| <b>Gastric</b>              | 2                       |   |               |   | 5             |   |
| <b>Head and Neck</b>        | 1                       |   | 1             |   | 6             |   |
| <b>Kidney</b>               |                         |   | 1             |   |               |   |
| <b>Leukemia</b>             |                         | 2 |               |   | 1             | 3 |
| <b>Liver</b>                |                         |   | 1             |   | 4             |   |
| <b>Lung</b>                 | 7                       |   |               |   | 9             |   |
| <b>Lymphoma</b>             | 1                       |   |               |   | 3             |   |
| <b>Melanoma</b>             | 2                       |   | 1             |   | 1             |   |
| <b>Myeloma</b>              |                         |   |               |   |               |   |
| <b>Other</b>                | 2                       |   | 6             |   | 2             | 2 |
| <b>Ovarian</b>              | 2                       |   |               |   | 2             |   |
| <b>Pancreatic</b>           |                         |   |               |   | 1             |   |
| <b>Prostate</b>             | 4                       |   |               |   | 1             |   |
| <b>Sarcoma</b>              |                         |   |               |   | 7             |   |
| Significant Unique Analyses | 42                      | 2 | 13            | 0 | 69            | 7 |
| Total Unique Analyses       | 459                     |   | 365           |   | 467           |   |
