# Supplementary material for: Translating Proteomic Into Functional Data: An High Mobility Group A1 (HMGA1) Proteomic Signature Has Prognostic Value in Breast Cancer
Source: PubMed Central journal article supplement (PMC4762532; doi:10.1074/mcp.m115.050401), 2015-11-02
Supplement: 10.1074_M115.050401_mcp.M115.050401-15.pdf [file 10.1074_M115.050401_mcp.M115.050401-15.pdf]

# S. Figure 5 - Maurizio et al.

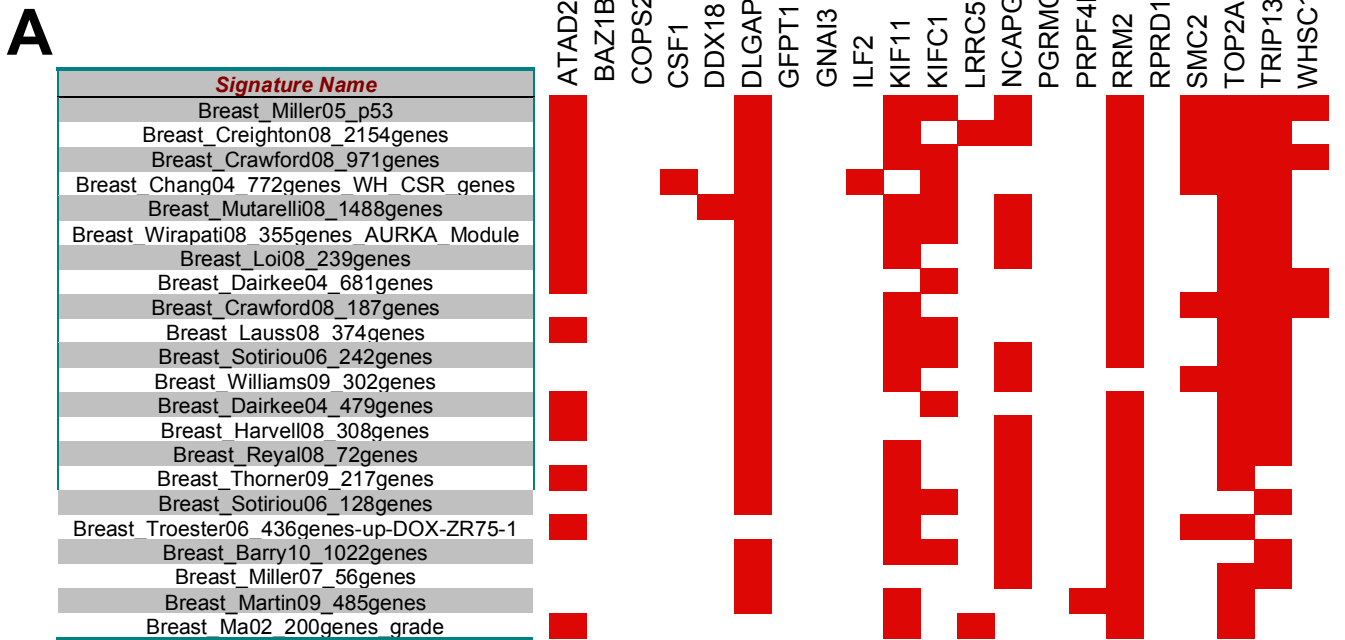

**B**

| Signature Name                           | Pubmed ID | Signature Size | Overlap | P | Argument                                                     |
|------------------------------------------|-----------|----------------|---------|---|--------------------------------------------------------------|
| Breast_Miller05_p53                      | 16141321  | 868            | 10      | 0 | p53 status and patient survival                              |
| Breast_Creighton08_2154genes             | 18757322  | 1803           | 9       | 0 | Insulin-like growth factor-I and poor BC prognosis           |
| Breast_Crawford08_971genes               | 18427120  | 376            | 9       | 0 | Bromodomain 4 activation and BC survival                     |
| Breast_Chang04_772genes_WH_CS R_genes    | 14737219  | 589            | 9       | 0 | fibroblast and human cancer progression                      |
| Breast_Mutarelli08_1488genes             | 18387200  | 1212           | 9       | 0 | hormone-responsive human BC cells                            |
| Breast_Wirapati08_355genes_AURK A_Module | 18662380  | 355            | 8       | 0 | Meta-analysis of gene expression profiles in BC              |
| Breast_Loi08_239genes                    | 18498629  | 183            | 7       | 0 | estrogen receptor-positive BC with tamoxifen                 |
| Breast_Dairkee04_681genes                | 15260889  | 523            | 7       | 0 | primary BC cultures                                          |
| Breast_Crawford08_187genes               | 18427120  | 141            | 7       | 0 | Bromodomain 4 activation and BC survival                     |
| Breast_Lauss08_374genes                  | 17899371  | 373            | 7       | 0 | Consensus of literature to predict BC recurrence             |
| Breast_Sotiriou06_242genes               | 16478745  | 205            | 7       | 0 | Gene expression profiling in BC                              |
| Breast_Williams09_302genes               | 19798054  | 246            | 6       | 0 | AP-2gamma in breast tumour cells                             |
| Breast_Dairkee04_479genes                | 15260889  | 378            | 6       | 0 | primary BC cultures                                          |
| Breast_Harvell08_308genes                | 18338247  | 215            | 6       | 0 | Estrogen in resp to neoadjuvant endocrine therapy of BC      |
| Breast_Reyal08_72genes                   | 19014521  | 63             | 6       | 0 | prognostic signatures in BC                                  |
| Breast_Thorner09_217genes                | 19043454  | 176            | 6       | 0 | B-Myb in basal-like BC                                       |
| Breast_Sotiriou06_128genes               | 16478745  | 110            | 6       | 0 | expression profiling in BC                                   |
| Breast_Troester06_436genes-up-DOX-ZR75-1 | 17150101  | 342            | 6       | 0 | p53 status in BC                                             |
| Breast_Barry10_1022genes                 | 20368555  | 850            | 6       | 0 | Intratumor heterogeneity and BC biology and clinical outcome |
| Breast_Miller07_56genes                  | 17885619  | 53             | 5       | 0 | BC and letrozole                                             |
| Breast_Martin09_485genes                 | 19225562  | 428            | 5       | 0 | tumor microenvironment between A/A and E/A BC patient        |
| Breast_Ma02_200genes_grade               | 12714683  | 174            | 5       | 0 | Gene expression profiles of human BC progression             |
