# Supplementary material for: Translating Proteomic Into Functional Data: An High Mobility Group A1 (HMGA1) Proteomic Signature Has Prognostic Value in Breast Cancer
Source: PubMed Central journal article supplement (PMC4762532; doi:10.1074/mcp.m115.050401), 2015-11-02
Supplement: 10.1074_M115.050401_mcp.M115.050401-17.pdf [file 10.1074_M115.050401_mcp.M115.050401-17.pdf]

# S. Figure 7 - Maurizio et al.

|                             |            | <b>KIFC1</b><br>(AB172620) | <b>LRRC59</b><br>(PA5-32057) | <b>TRIP13</b><br>(HPA005727) | <b>HMGAI</b><br>(homemade 1°) |
|-----------------------------|------------|----------------------------|------------------------------|------------------------------|-------------------------------|
| <b>Patients - Histology</b> |            |                            |                              |                              |                               |
| 148-07 - ILC                | <b>N/A</b> |                            |                              |                              |                               |
| 641-03 - ILC                |            |                            |                              |                              |                               |
| 1582-11 - DCIS              | <b>N/A</b> |                            |                              |                              |                               |
| 4363-06 - DCIS              |            |                            |                              |                              |                               |
| 5029-05 - IDC               | <b>N/A</b> |                            |                              |                              |                               |
| 0064-05 - IDC               |            |                            |                              |                              |                               |
| 4731-11 - IDC               |            |                            |                              |                              |                               |
| 5522-08 - IDC               |            |                            |                              |                              |                               |
| 2578-02 - IDC               |            |                            |                              |                              |                               |
| 1890-04 - IDC               |            |                            |                              |                              |                               |
| 3675-05 - IDC               | <b>N/A</b> |                            |                              |                              |                               |
