# Supplementary material for: Translating Proteomic Into Functional Data: An High Mobility Group A1 (HMGA1) Proteomic Signature Has Prognostic Value in Breast Cancer
Source: PubMed Central journal article supplement (PMC4762532; doi:10.1074/mcp.m115.050401), 2015-11-02

# S. Figure 8 - Maurizio et al.

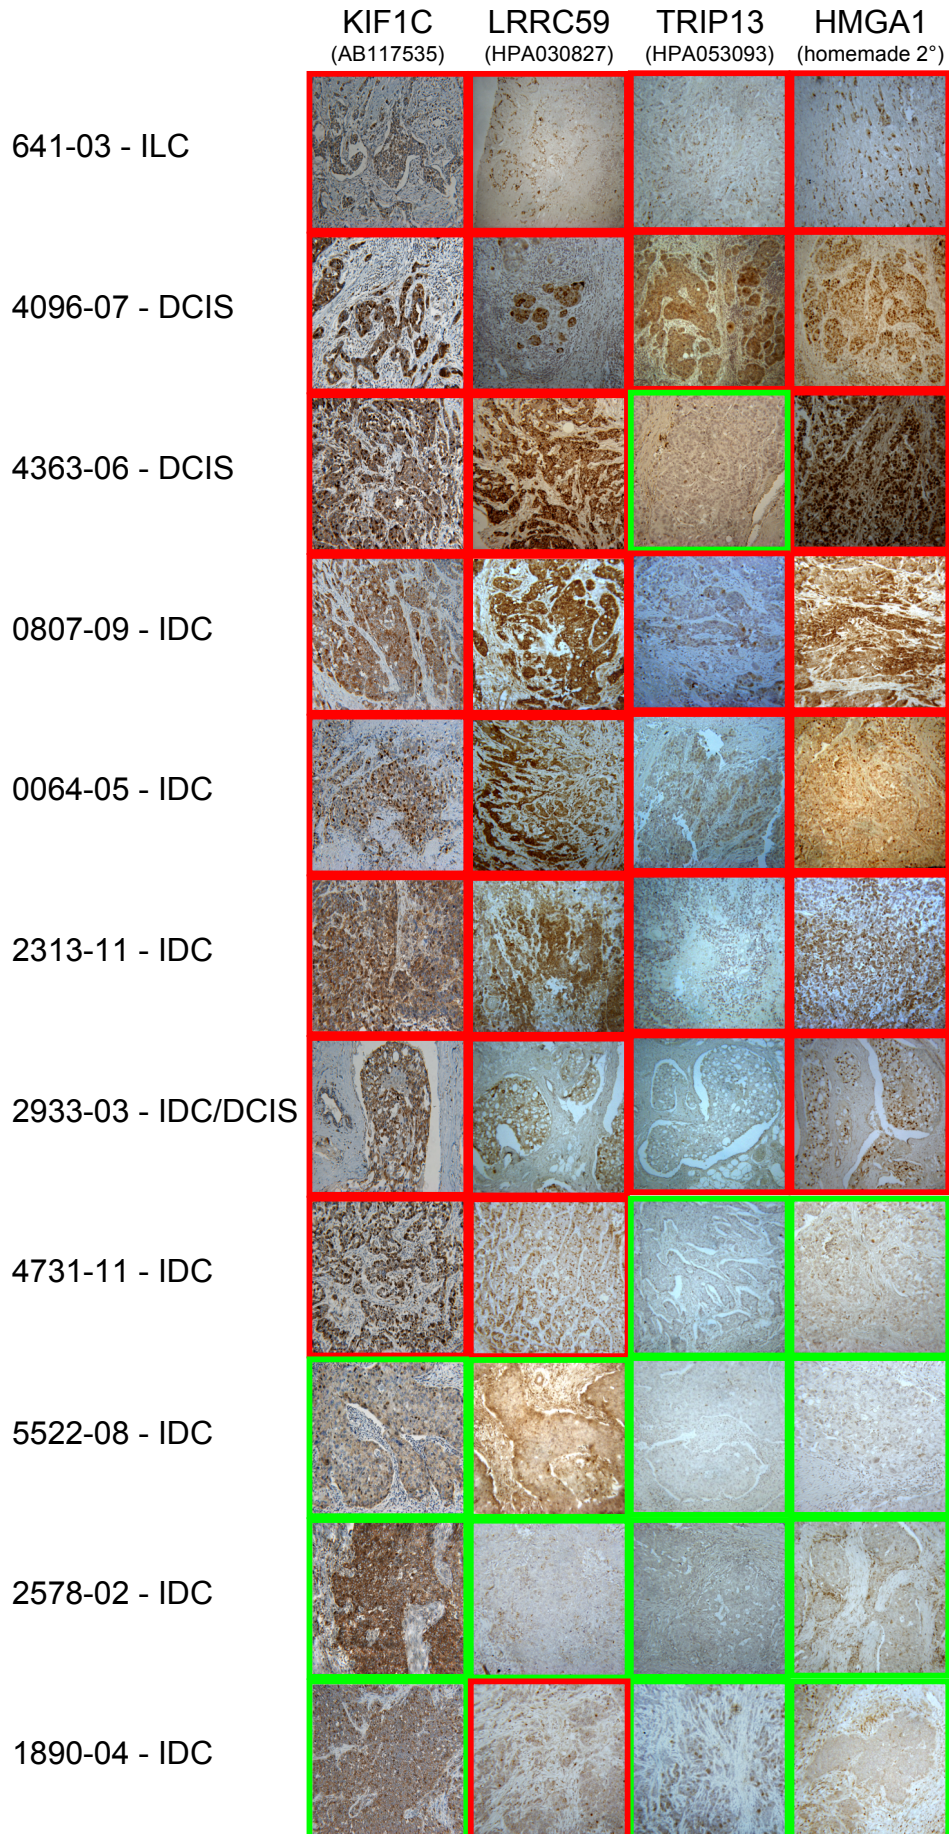

Supplement: 10.1074_M115.050401_mcp.M115.050401-18.pdf [file 10.1074_M115.050401_mcp.M115.050401-18.pdf]
